# Supplementary material
Source: publisher figshare collection journal article supplement (https://tandf.figshare.com/ndownloader/files/31583848)
Supplement: Supplementary file 1 [file 31583848]

***Sonitictis*** ***moralesi*, gen. et sp. nov, a new hypercarnivorous and durophagous mustelid from middle Miocene Tunggur Formation, Inner Mongolia, China and its functional morphology**

Xiaoming Wang, Z. Jack Tseng, Qigao Jiangzuo, Shiqi Wang, Hongjiang Wang

**Supplemental Figure 1S**. Lateral view of jaw models used in the mandibular force profile analyses. **A**. *Mellivora capensis*, MVZ 184107, **B**. *Sonitictis moralesi*, IVPP V28317; **C**. *Mellivora capensis*, LACM (M) 28121; **D**. *Eomellivora wimani*, LACM 162957; **E**. *Canis lupus*, LACM (M) 23010. **
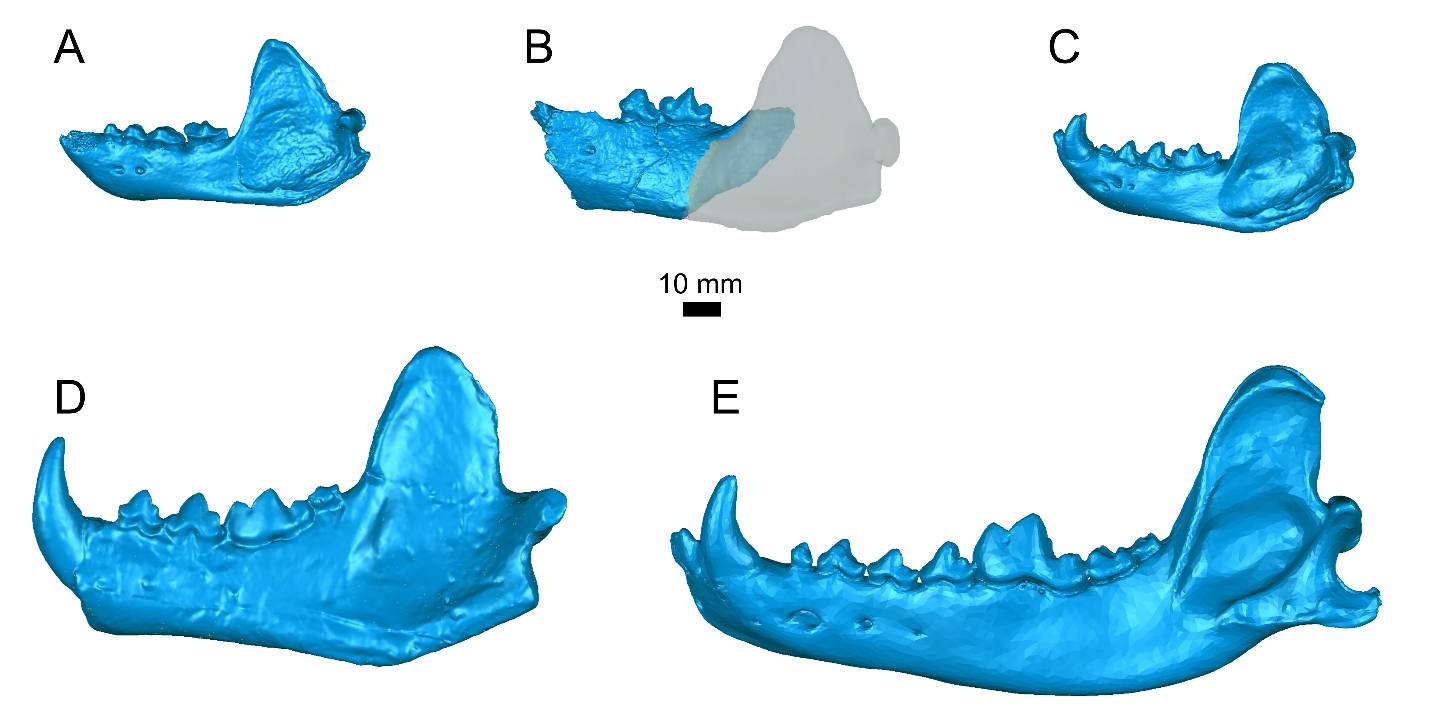
**
